# Supplementary material for: Automated and controlled mechanical stimulation and functional imaging in vivo in C. elegans
Source: Royal Society of Chemistry journal article supplement (doi:10.1039/c7lc00465f), 2017-01-01
Supplement: c7lc00465f1.pdf [file c7lc00465f1.pdf]

## 1 Supplemental Figures

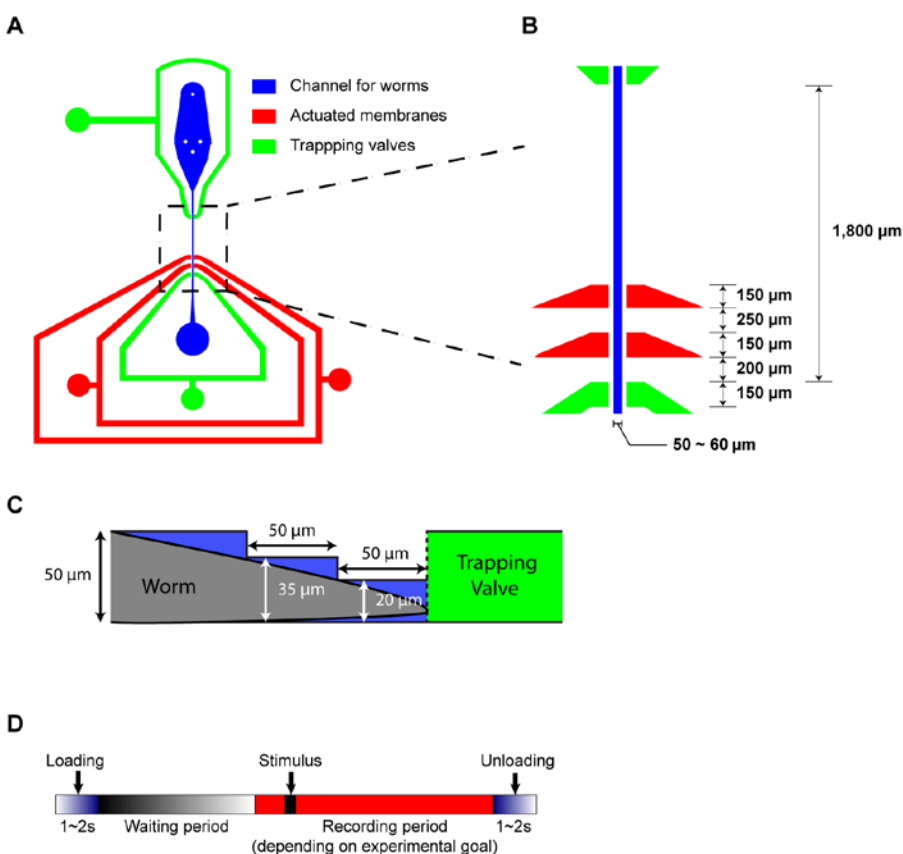

2

3 **Fig. S1.** Overview of microfluidic device design and dimensions.

4 (A and B) The device is composed of the channel for worms (50-60  $\mu\text{m}$  deep and wide, which

5 allow the animals to fit loosely inside), two sets of actuated membrane, and two sets of trapping

6 valve. The width of both actuated PDMS membrane and trapping valve is 150  $\mu\text{m}$ , the distance

7 between first and second sets of membrane is 200  $\mu\text{m}$  and second and third sets of membrane is

8 250  $\mu\text{m}$ . (C) Diagram of scheme for restriction of the z-direction range of motion via a three-step

9 vertical imaging channel. (D) Timeline of on-chip mechano-stimulation and functional imaging of

10 neurons. The loading and unloading of each worm requires only a few seconds. Each animal is

11 given a waiting period to acclimate to the environment before being stimulated and imaged. Each

12 trial is performed by recording video to track neuronal dynamic responses and applying

13 mechanical stimuli.

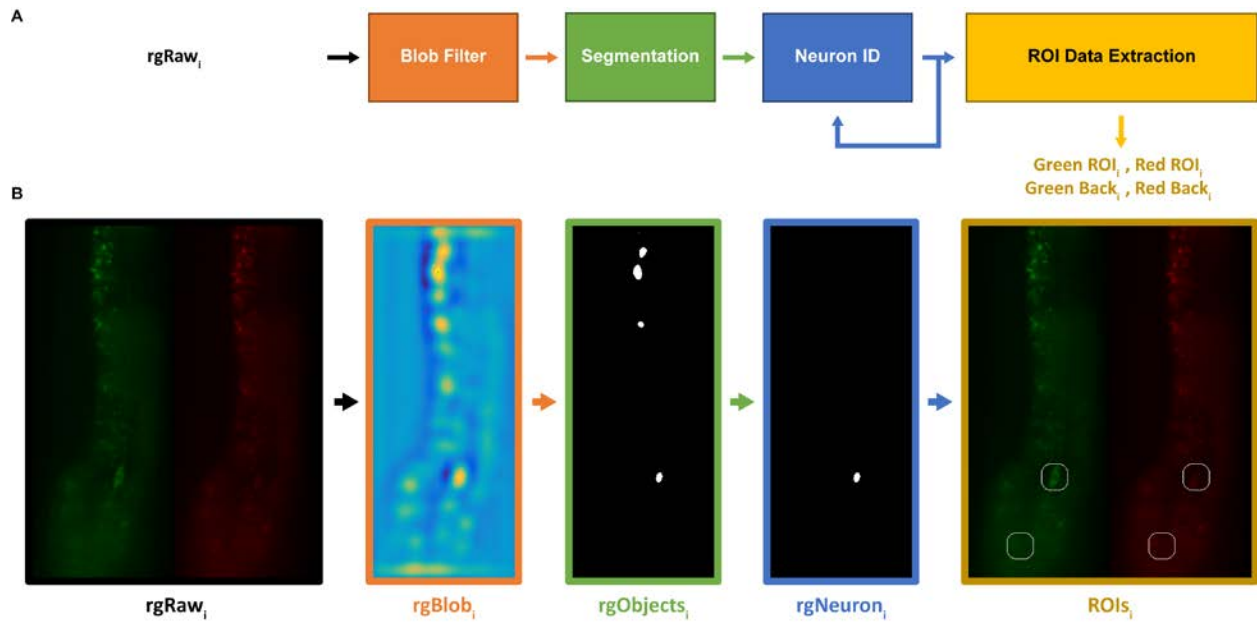

14

15 **Fig. S2.** Neuron Tracking Algorithm. In order to extract fluorescence intensities throughout  
 16 recordings, a neuron tracking algorithm was developed. This was necessary because worms are  
 17 not fully immobilized in the device, and mechanical stimuli often caused the neuron of interest to  
 18 move within the field-of-view. (A) Overall schematic of the neuron tracking algorithm. For each  
 19 frame  $i$ , raw images are processed through a blob filter (Laplace of Gaussian filter) to improve  
 20 contrast and facilitate segmentation. Blob filtered images are segmented by applying an  
 21 empirically determined threshold. The neuron of interest is identified by the user in the first frame,  
 22 and by distance to the neuron in the previous frame. Lastly, once the neuron is detected for each  
 23 frame, intensity values are extracted (Green ROI, Red ROI, Green Background, and Red  
 24 Background). (B) Example of algorithm procedure.

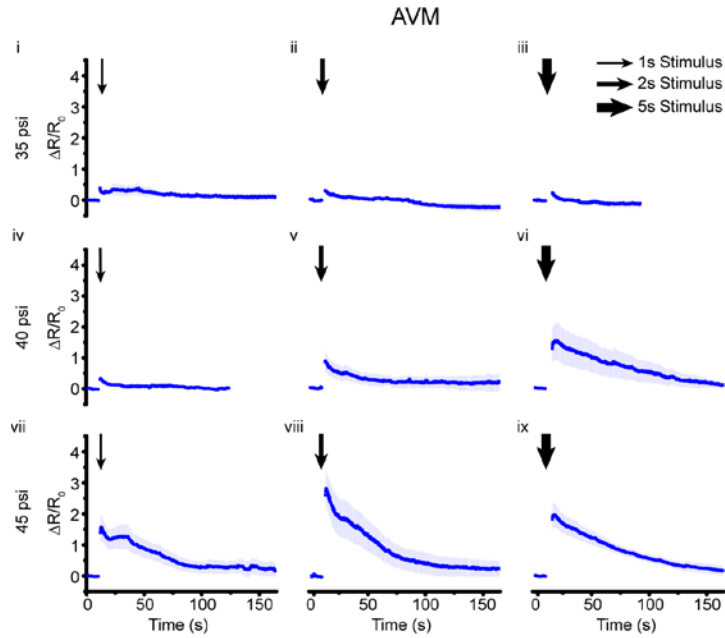

25

26

27 **Fig. S3.** Average traces of GCaMP6 signal in AVM neuron in response to diverse pressures and  
 28 stimulus durations (**i-iii**: 35 psi, **iv-vi**: 40 psi, **vii-ix**: 45 psi / **i, iv, vii**: 1s stimulus, **ii, v, viii**: 2s  
 29 stimulus, **iii, vi, ix**: 5s stimulus, sample size **i**: n=25, **ii**: n=10, **iii**: n=8, **iv**: n=8, **v**: n=10, **vi**: n=10,  
 30 **vii**: n=27, **viii**: n=6, **ix**: n=10). Error bars represent SEM.

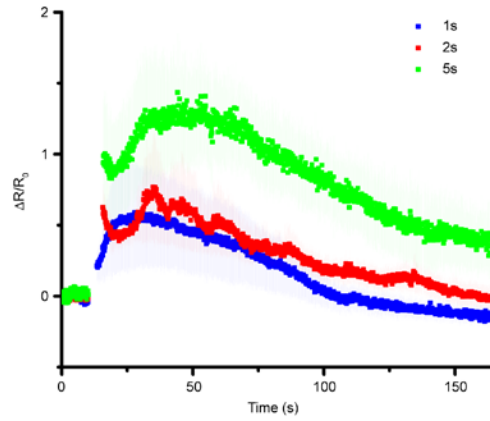

31

32 **Fig. S4.** PLM cell body responses to various stimulus durations (1s: n=9, 2s: n=4, 5s: n=4) at 45  
 33 psi. Similar to those of AVM, maximum responses in PLM were proportional to the stimulus  
 34 duration.

35

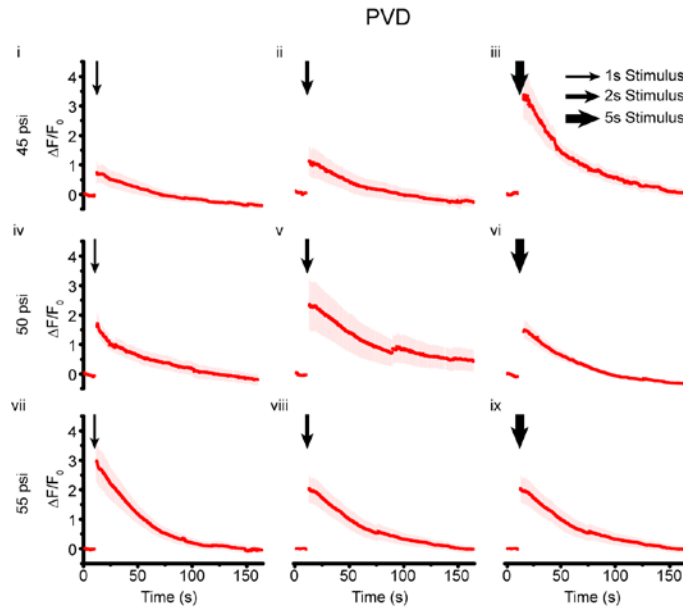

36

37 **Fig. S5.** Average traces of GCaMP6 signal in PVD neuron in response to diverse pressures and  
 38 stimulus durations (**i-iii**: 45 psi, **iv-vi**: 50 psi, **vii-ix**: 55 psi / **i, iv, vii**: 1s stimulus, **ii, v, viii**: 2s  
 39 stimulus, **iii, vi, ix**: 5s stimulus, sample size **i**: n=9, **ii**: n=4, **iii**: n=6, **iv**: n=6, **v**: n=9, **vi**: n=10, **vii**:  
 40 n=9, **viii**: n=10, **ix**: n=10). Error bar represent SEM.

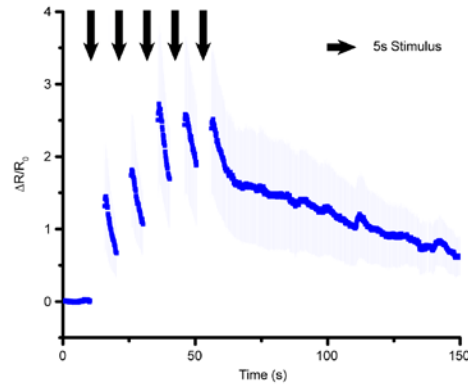

41

42 **Fig. S6.** AVM cell body response to delivery of repeated 5s stimuli with 5s inter-stimulus intervals  
 43 (n=5). Similar to Figure 21, traces showed incremental increases in the first few stimuli, and  
 44 showed a decreased response in later stimuli.

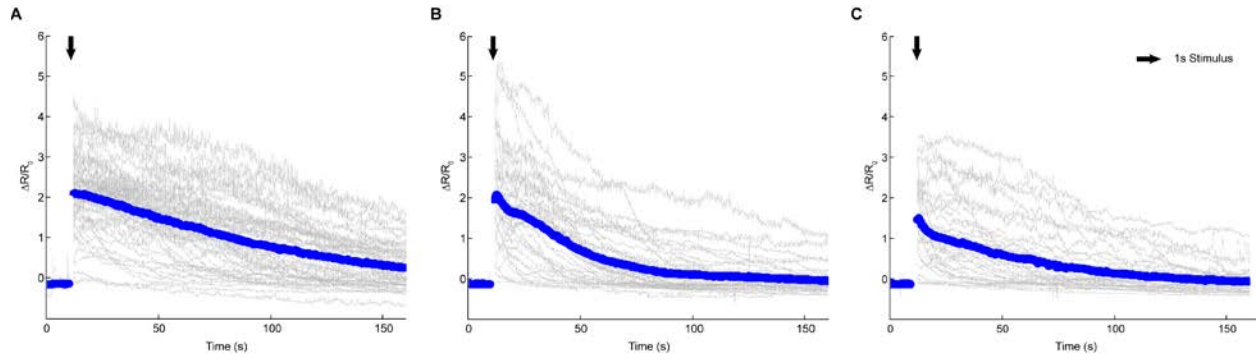

45

46 **Fig. S7.** Individual (gray) and average traces (blue) for AVM response in untreated animals for  
 47 different control groups for drug screen. (A) Day 1 (n=53), (B) Day 2 (n=53), and (C) Day 3 (n=35)  
 48 adult worms.

49

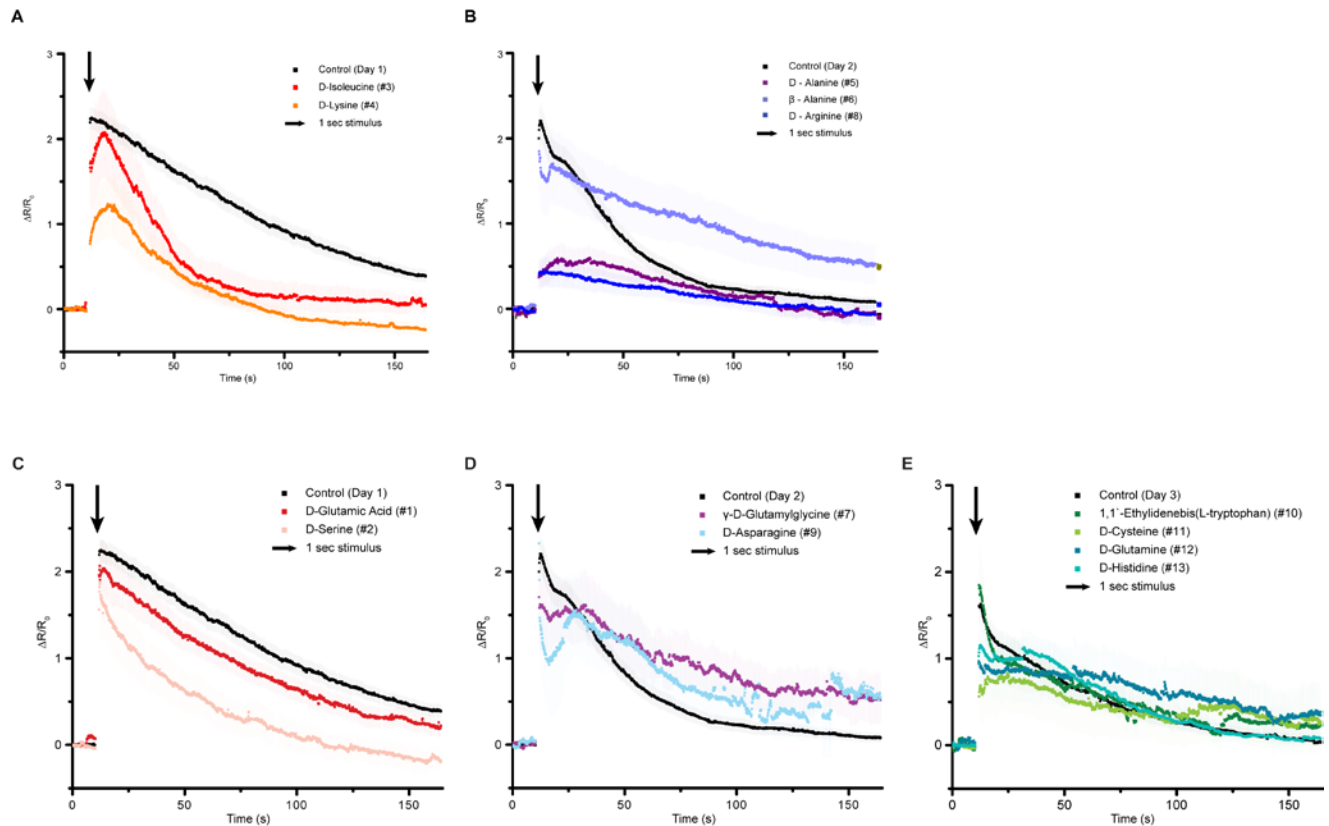

50

51 **Fig. S8.** Average traces for AVM response in drug-treated animals. (A and B) Average traces for  
 52 AVM response in drug-treated animals that show a significant difference from the control groups.  
 53 (A) Day 1 adult worms (Control Day 1: n=53, D-Isoleucine: n=10, D-Lysine: n=10). (B) Day 2  
 54 adult worms (Control Day 2: n=53, D-Alanine: n=15,  $\beta$ -Alanine: n=14, D-Arginine: n=13). (C-E)  
 55 Average traces for AVM response in drug-treated animals that do not show a significant difference  
 56 from the control groups. (C) Day 1 adult worms (Control Day 1: n=53, D-Glutamic acid: n=10, D-  
 57 Serine: n=12), (D) Day 2 adult worms (Control Day 2: n=53,  $\gamma$ -D-Glutamylglycine: n=10, D-  
 58 Asparagine: n=4), and (E) Day 3 adult worms (Control Day 3: n=35, 1,1'-Ethylidene-bis(L-  
 59 tryptophan): n=10, D-Cysteine: n=10, D-Glutamine: n=11, D-Histidine: n=13).

60



| Number | Name                              | Rationale                       | Sample size | Number of responding worms |
|--------|-----------------------------------|---------------------------------|-------------|----------------------------|
| 1      | D-Glutamic acid                   | Putative endogenous ligand      | 10          | 9                          |
| 2      | D-Serine                          | Putative endogenous ligand      | 12          | 8                          |
| 3      | D-Isoleucine                      | D-Amino acid                    | 10          | 7                          |
| 4      | D-Lysine                          | D-Amino acid                    | 10          | 8                          |
| 5      | D-Alanine                         | D-Amino acid                    | 15          | 7                          |
| 6      | $\beta$ -Alanine                  | Endogenous                      | 14          | 11                         |
| 7      | $\gamma$ -D-Glutamylglycine       | D-Amino acid                    | 10          | 9                          |
| 8      | D-Arginine                        | D-Amino acid                    | 13          | 6                          |
| 9      | D-Asparagine                      | D-Amino acid                    | 4           | 4                          |
| 10     | 1,1'-Ethylidene-bis(L-tryptophan) | Bioactive tryptophan derivative | 10          | 8                          |
| 11     | D-Cysteine                        | D-Amino acid                    | 10          | 6                          |
| 12     | D-Glutamine                       | D-Amino acid                    | 11          | 6                          |
| 13     | D-Histidine                       | D-Amino acid                    | 13          | 12                         |

61

62 **Table S1.** The 13 compounds of the orphan library were used for the drug screen. Sample size is  
63 the total number of tested worms and if the value of maximum responses is larger than 0.5, it is  
64 counted as a responding worm.

65 **Video 1:** Calcium dynamics of AVM neuron to 0.5s anterior stimulation at 20psi. Stimulus was  
66 delivered 10s after recording baseline of neuronal activity. The transgenic animal shown here  
67 expresses GCaMP6 and RFP in AVM neuron (*ljIs142[mec-4::GCaMP6m::SL2TagRFP, unc-119]*  
68 *II; unc-119(ed3) III*). Left panel shows green fluorescence from GCaMP6m (left) and red  
69 fluorescence from RFP (right) in false colors. White boxes indicate location of AVM neuron and  
70 shows how algorithm tracks the neuron. Right graph shows the quantitative calcium trace and red  
71 circle indicates the current time point of video. Stimulus occurs at 10s (red dash line). 5x playback.

72

73 **Video 2:** Calcium dynamics of PLM neuron to 1s posterior stimulation at 45psi. Stimulus was  
74 delivered 10s after recording baseline of neuronal activity. The transgenic animal shown here  
75 expresses GCaMP6 and RFP in PLM neuron (*ljIs142[mec-4::GCaMP6m::SL2TagRFP, unc-119]*  
76 *II; unc-119(ed3) III*). Left panel shows green fluorescence from GCaMP6m (left) and red  
77 fluorescence from RFP (right) in false colors. White boxes indicate location of PLM neuron and  
78 shows how algorithm tracks the neuron. Right graph shows the quantitative calcium trace and red  
79 circle indicates the current time point of video. Stimulus occurs at 10s (red dash line). 5x playback.

80

81 **Video 3:** Calcium dynamics of AVM neuron to 1s anterior stimulation at 45psi. Stimulus was  
82 delivered 10s after recording baseline of neuronal activity. The transgenic animal shown here  
83 expresses GCaMP6 and RFP in AVM neuron (*ljIs142[mec-4::GCaMP6m::SL2TagRFP, unc-119]*  
84 *II; unc-119(ed3) III*). Left panel shows green fluorescence from GCaMP6m (left) and red  
85 fluorescence from RFP (right) in false colors. White boxes indicate location of AVM neuron and  
86 shows how algorithm tracks the neuron. Right graph shows the quantitative calcium trace and red  
87 circle indicates the current time point of video. Stimulus occurs at 10s (red dash line). 5x playback.

88

89 **Video 4:** Calcium dynamics of PVD neuron to 1s posterior stimulation at 45psi. Stimulus was  
90 delivered 10s after recording baseline of neuronal activity. The transgenic animal shown here  
91 expresses GCaMP6 in PVD neuron (*wyls5007[ser2prom3::GCaMP6, egl-17::mCherry] X*). Left  
92 panel shows green fluorescence from GCaMP6 in false color. A white box indicates location of  
93 PVD neuron and shows how algorithm tracks the neuron. Right graph shows the quantitative

94 calcium trace and red circle indicates the current time point of video. Stimulus occurs at 10s (red  
95 dash line). 5x playback.
